# Supplementary material for: The use of maoto (Ma-Huang-Tang), a traditional Japanese Kampo medicine, to alleviate flu symptoms: a systematic review and meta-analysis
Source: Springer Nature journal article supplement (doi:10.1186/s12906-019-2474-z), 2019-03-18

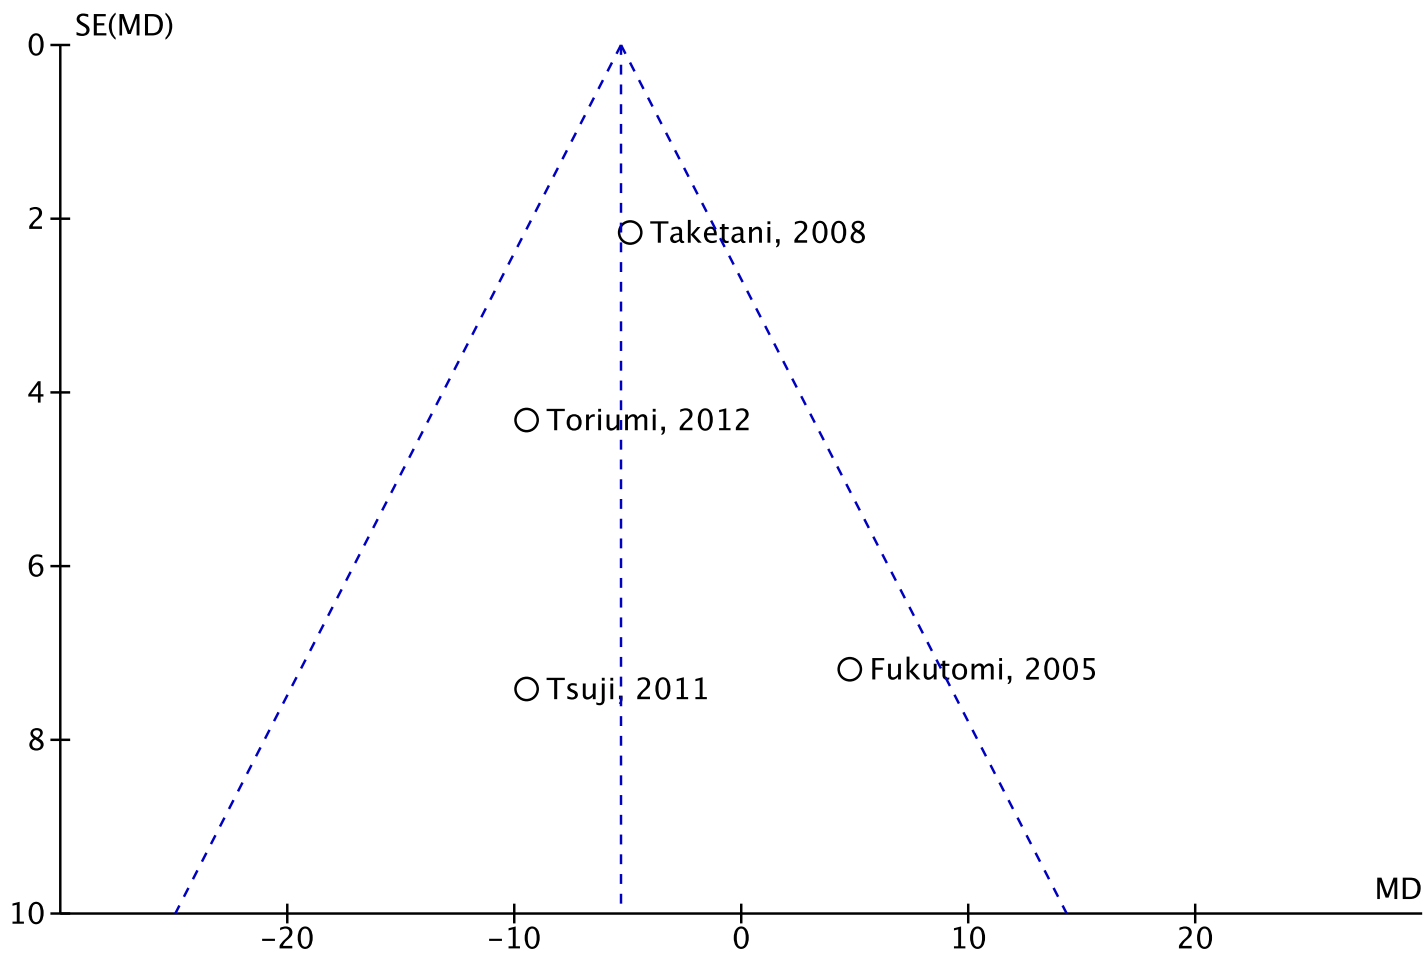

Supplement: MOESM3 [file 16557290]
